# Supplementary material for: Year-Round Influenza a Virus Surveillance in Mallards (Anas platyrhynchos) Reveals Genetic Persistence During the Under-Sampled Spring Season
Source: Viruses. 2020 Jun 11;12(6):632. doi: 10.3390/v12060632 (PMC7354581; doi:10.3390/v12060632)
Supplement: Supplementary file 1 [file viruses-12-00632-s001.zip › Table S1_Genbank Accessions.xlsx]

## Sheet: Sheet1
Table S1: GenBank accession numbers of viral isolates recovered from mallards during the study period.
			GenBank Accession Number
			PB2	PB1	PA	HA	NP	NA	MP	NS
Viral Isolate		A/Mallard/Ohio/17OS1691/2017(H3N8)	MT566299	MT566298	MT566300	MT566305	MT566304	MT566302	MT566301	MT566303
		A/Mallard/Ohio/17OS1696/2017(H3N8)	MT566395	MT566397	MT566393	MT566398	MT566396	MT566392	MT566399	MT566394
		A/Mallard/Ohio/17OS1716/2017(H3N8)	MT566224	MT566221	MT566223	MT566217	MT566222	MT566220	MT566218	MT566219
		A/Mallard/Ohio/17OS1722/2017(H3N8)	MT566365	MT566370	MT566371	MT566367	MT566369	MT566364	MT566368	MT566366
		A/Mallard/Ohio/17OS1727/2017(H10N8)	MK236618	MK237425	MK237077	MK236635	MK237983	MK237471	MK237939	MK237796
		A/Mallard/Ohio/17OS1730/2017(H1N8)	MK237582	MK237486	MK237061	MK237041	MK237760	MK237275	MK236644	MK237660
		A/Mallard/Ohio/17OS1734/2017(H1N8)	MK237682	MK237210	MK237650	MK236832	MK237371	MK237046	MK237587	MK237636
		A/Mallard/Ohio/17OS1737/2017(H1N8)	MK237872	MK237337	MK237832	MK237675	MK236950	MK237551	MK236874	MK237070
		A/Mallard/Ohio/17OS1739/2017(H3N8)	MK237835	MK236879	MK236836	MK236690	MK237096	MK237698	MK236676	MK237856
		A/Mallard/Ohio/17OS1740/2017(H3N8)	MK237472	MK237003	MK237777	MK237142	MK237076	MK237340	MK237957	MK237496
		A/Mallard/Ohio/17OS1743/2017(H1N8)	MK236797	MK237977	MK237485	MK237692	MK236666	MK237475	MK237476	MK236730
		A/Mallard/Ohio/17OS1744/2017(H3N8)	MT566337	MT566333	MT566338	MT566336	MT566334	MT566335	MT566339	MT566332
		A/Mallard/Ohio/17OS1746/2017(H3N8)	MK236784	MK237935	MK237757	MK236718	MK236962	MK237380	MK237773	MK237610
		A/Mallard/Ohio/17OS1747/2017(H1N1)	MT566275	MT566281	MT566279	MT566280	MT566274	MT566276	MT566277	MT566278
		A/Mallard/Ohio/17OS1750/2017(H3N8)	MK237607	MK236811	MK236907	MK236791	MK237584	MK237212	MK237866	MK237533
		A/Mallard/Ohio/17OS1751/2017(H1N8)	MK236977	MK237370	MK236770	MK237795	MK236914	MK237143	MK237121	MK237148
		A/Mallard/Ohio/17OS1752/2017(H3N8)	MK236818	MK236664	MK236714	MK236906	MK237479	MK237241	MK236999	MK237803
		A/Mallard/Ohio/17OS1754/2017(H3N8)	MK237141	MK237364	MK237950	MK236800	MK236711	MK237014	MK237850	MK237571
		A/Mallard/Ohio/17OS1756/2017(H1N8)	MK237349	MK236732	MK237612	MK236726	MK237535	MK236701	MK236828	MK237833
		A/Mallard/Ohio/17OS1758/2017(H1N8)	MK236806	MK237456	MK237207	MK237578	MK237933	MK236796	MK237908	MK236926
		A/Mallard/Ohio/17OS1759/2017(H3N8)	MT566245	MT566244	MT566246	MT566243	MT566241	MT566248	MT566242	MT566247
		A/Mallard/Ohio/17OS1762/2017(H3N8)	MK236622	MK237342	MK237095	MK237422	MK236943	MK237354	MK237319	MK236782
		A/Mallard/Ohio/17OS1763/2017(H1N8)	MK237384	MK237739	MK236722	MK237211	MK237820	MK237700	MK237537	MK237182
		A/Mallard/Ohio/17OS1764/2017(H3N8)	MK237000	MK236885	MK237727	MK236660	MK237822	MK237949	MK237047	MK237958
		A/Mallard/Ohio/17OS1772/2017(H3N8)	MK237985	MK237406	MK237263	MK236829	MK237080	MK237744	MK237091	MK236634
		A/Mallard/Ohio/17OS1775/2017(H3N8)	MK237673	MK237544	MK237071	MK237413	MK237913	MK237198	MK236916	MK237464
		A/Mallard/Ohio/17OS1776/2017(H3N8)	MT566311	MT566309	MT566308	MT566310	MT566313	MT566312	MT566314	MT566307
		A/Mallard/Ohio/17OS1779/2017(H3N8)	MT566269	MT566273	MT566268	MT566267	MT566266	MT566272	MT566270	MT566271
		A/Mallard/Ohio/17OS1780/2017(Mixed)	MT565732	MT565730	MT565728	MT565724	MT565725	MT565731 MT565726	MT565729	MT565727
		A/Mallard/Ohio/17OS1781/2017(H3N8)	MT565673	MT565675	MT565672	MT565674	MT565668	MT565671	MT565669	MT565670
		A/Mallard/Ohio/17OS1782/2017(H3N8)	MT565681	MT565676	MT565682	MT565679	MT565683	MT565678	MT565680	MT565677
		A/Mallard/Ohio/17OS1783/2017(Mixed)	MT565748	MT565742	MT565743	MT565746	MT565747	MT565749 MT565741	MT565745	MT565744
		A/Mallard/Ohio/17OS1784/2017(H3N8)	MT565639	MT565642	MT565638	MT565636	MT565640	MT565637	MT565641	MT565643
		A/Mallard/Ohio/17OS1785/2017(H3N8)	MT565712	MT565713	MT565714	MT565715	MT565710	MT565708	MT565711	MT565709
		A/Mallard/Ohio/17OS1786/2017(H3N8)	MK237230	MK236625	MK237750	MK237409	MK237911	MK237258	MK237844	MK237073
		A/Mallard/Ohio/17OS1795/2017(H3N2)	MK237093	MK237277	MK236719	MK236988	MK236983	MK237081	MK236700	MK237764
		A/Mallard/Ohio/17OS1796/2017(H3N2)	MK236837	MK237267	MK237220	MK237603	MK237414	MK237693	MK236955	MK237574
		A/Mallard/Ohio/17OS1798/2017(H3N2)	MT565703	MT565705	MT565706	MT565707	MT565700	MT565704	MT565701	MT565702
		A/Mallard/Ohio/17OS1800/2017(H1N8)	MK237474	MK237199	MK237901	MK237602	MK236910	MK237616	MK236786	MK236960
		A/Mallard/Ohio/17OS1801/2017(H3N2)	MK237312	MK237339	MK237937	MK237791	MK237665	MK236704	MK237794	MK237813
		A/Mallard/Ohio/17OS1802/2017(H3N2)	MK237164	MK237953	MK237488	MK237006	MK237668	MK237825	MK236785	MK237147
		A/Mallard/Ohio/17OS1804/2017(H3N2)	MK237293	MK237767	MK237222	MK237415	MK237246	MK237590	MK237057	MK237444
		A/Mallard/Ohio/17OS1805/2017(H3N2)	MT566153	MT566151	MT566152	MT566150	MT566155	MT566157	MT566156	MT566154
		A/Mallard/Ohio/17OS1806/2017(H3N2)	MK236931	MK237605	MK237132	MK237050	MK237861	MK236713	MK237138	MK237332
		A/Mallard/Ohio/17OS1807/2017(H3N2)	MK237596	MK237192	MK237898	MK237382	MK237395	MK237564	MK237575	MK237768
		A/Mallard/Ohio/17OS1809/2017(H1N8)	MT565737	MT565733	MT565734	MT565738	MT565740	MT565736	MT565735	MT565739
		A/Mallard/Ohio/17OS1813/2017(H1N1)	MK236984	MK237701	MK237944	MK237545	MK237790	MK237515	MK237771	MK237442
		A/Mallard/Ohio/17OS1816/2017(H3N8)	MK237986	MK237152	MK237748	MK236942	MK237375	MK236698	MK237389	MK237063
		A/Mallard/Ohio/17OS1892/2017(H10N7)	MK236922	MK236697	MK237632	MK237910	MK237805	MK237634	MK237635	MK237037
		A/Mallard/Ohio/17OS1901/2017(H10N1)	MT565698	MT565697	MT565699	MT565696	MT565692	MT565695	MT565693	MT565694
		A/Mallard/Ohio/17OS1902/2017(H10N1)	MT565720	MT565722	MT565716	MT565723	MT565717	MT565721	MT565719	MT565718
		A/Mallard/Ohio/17OS1907/2017(H1N8)	MK237187	MK237589	MK236905	MK237067	MK236708	MK237954	MK237588	MK237756
		A/Mallard/Ohio/17OS1909/2017(H1N8)	MT566170	MT566166	MT566173	MT566168	MT566171	MT566172	MT566167	MT566169
		A/Mallard/Ohio/17OS1910/2017(H1N1)	MK236721	MK236822	MK236990	MK237466	MK237586	MK237604	MK236659	MK236814
		A/Mallard/Ohio/17OS1911/2017(H1N1)	MK237681	MK237629	MK237925	MK237009	MK237687	MK237122	MK237806	MK237827
		A/Mallard/Ohio/17OS1912/2017(H1N1)	MK236892	MK237849	MK236888	MK236804	MK237661	MK236745	MK236824	MK237506
		A/Mallard/Ohio/17OS1915/2017(H3N8)	MT565616	MT565612	MT565617	MT565615	MT565613	MT565618	MT565619	MT565614
		A/Mallard/Ohio/17OS1916/2017(H3N8)	MT565659	MT565652	MT565656	MT565654	MT565653	MT565657	MT565658	MT565655
		A/Mallard/Ohio/17OS1917/2017(Mixed)	MT565596	MT565594	MT565595	MT566412 MT565597	MT566411	MT565598	MT566414	MT566413
		A/Mallard/Ohio/17OS1918/2017(H3N8)	MT566165	MT566158	MT566161	MT566164	MT566160	MT566163	MT566159	MT566162
		A/Mallard/Ohio/17OS1919/2017(H3N8)	MT565684	MT565688	MT565687	MT565685	MT565686	MT565690	MT565691	MT565689
		A/Mallard/Ohio/17OS1920/2017(H3N8)	MT566175	MT566174	MT566179	MT566176	MT566178	MT566177	MT566180
		A/Mallard/Ohio/17OS1921/2017(H3N8)	MT565664	MT565663	MT565662	MT565665	MT565667	MT565660	MT565666	MT565661
		A/Mallard/Ohio/17OS1922/2017(H3N8)	MT566187	MT566185	MT566183	MT566184	MT566181	MT566186	MT566182	MT566188
		A/Mallard/Ohio/17OS1923/2017(H3N8)	MT565632	MT565629	MT565631	MT565633	MT565628	MT565634	MT565635	MT565630
		A/Mallard/Ohio/17OS1924/2017(H3N8)	MT565646	MT565644	MT565648	MT565650	MT565651	MT565645	MT565649	MT565647
		A/Mallard/Ohio/17OS1925/2017(H3N8)	MT565587	MT565592	MT565593	MT565590	MT565589	MT565588	MT565586	MT565591
		A/Mallard/Ohio/17OS1926/2017(H3N8)	MT565607	MT565609	MT565611	MT565604	MT565610	MT565605	MT565606	MT565608
		A/Mallard/Ohio/17OS1927/2017(H3N8)	MT565624	MT565626	MT565622	MT565620	MT565627	MT565625	MT565623	MT565621
		A/Mallard/Ohio/17OS1928/2017(H3N8)	MT566225	MT566228	MT566230	MT566229	MT566226	MT566232	MT566231	MT566227
		A/Mallard/Ohio/17OS1929/2017(H3N8)	MT566316	MT566321	MT566319	MT566320	MT566317	MT566315	MT566318	MT566415
		A/Mallard/Ohio/17OS1930/2017(H3N8)	MT566363	MT566360	MT566362	MT566357	MT566356	MT566359	MT566361	MT566358
		A/Mallard/Ohio/17OS1931/2017(H3N8)	MT566378	MT566374	MT566373	MT566376	MT566372	MT566375	MT566377	MT566417
		A/Mallard/Ohio/17OS1932/2017(H3N8)	MT566342	MT566345	MT566344	MT566340	MT566346	MT566343	MT566341	MT566355
		A/Mallard/Ohio/17OS1933/2017(H3N8)	MT566293	MT566297	MT566291	MT566296	MT566295	MT566290	MT566294	MT566292
		A/Mallard/Ohio/17OS1934/2017(H3N8)	MT566352	MT566350	MT566354	MT566348	MT566349	MT566347	MT566353	MT566351
		A/Mallard/Ohio/17OS1935/2017(H3N8)	MT566202	MT566199	MT566206	MT566200	MT566203	MT566205	MT566201	MT566204
		A/Mallard/Ohio/17OS1936/2017(H3N8)	MT566235	MT566233	MT566237	MT566236	MT566239	MT566240	MT566234	MT566238
		A/Mallard/Ohio/17OS1938/2017(H3N8)	MK237904	MK236819	MK236754	MK237455	MK237291	MK237251	MK237494	MK237659
		A/Mallard/Ohio/17OS1939/2017(H3N8)	MT566254	MT566251	MT566255	MT566252	MT566249	MT566256	MT566250	MT566253
		A/Mallard/Ohio/17OS1941/2017(H3N8)	MT566289	MT566287	MT566284	MT566283	MT566285	MT566282	MT566286	MT566288
		A/Mallard/Ohio/17OS1947/2017(Mixed)	MT566208	MT566213	MT566212	MT566211 MT566209	MT566215	MT566216 MT566207	MT566214	MT566210
		A/Mallard/Ohio/17OS1951/2017(H3N8)	MT566326	MT566328	MT566327	MT566329	MT566324	MT566330	MT566325	MT566331
		A/Mallard/Ohio/17OS1955/2017(H3N8)	MK237759	MK237432	MK236937	MK237388	MK237209	MK236949	MK237484	MK237099
		A/Mallard/Ohio/17OS1957/2017(H3N8)	MT566390	MT566385	MT566391	MT566389	MT566388	MT566384	MT566387	MT566386
		A/Mallard/Ohio/17OS1958/2017(H1N2)	MK237015	MK237336	MK237180	MK237509	MK236889	MK236755	MK237356	MK236693
		A/Mallard/Ohio/17OS1961/2017(Mixed)	MT566257	MT566263	MT566261	MT566265 MT566258	MT566259	MT566262 MT566416	MT566264	MT566260
		A/Mallard/Ohio/17OS1964/2017(H3N2)	MK236692	MK237890	MK236865	MK237792	MK236966	MK236789	MK237185	MK236696
		A/Mallard/Ohio/17OS1973/2017(H3N8)	MK237549	MK237917	MK237129	MK237778	MK236632	MK237101	MK237713	MK237626
		A/Mallard/Ohio/17OS1989/2017(Mixed)	MT566190	MT566195	MT566197	MT566196 MT566198	MT566193	MT566194 MT566400 MT566192	MT566189	MT566191
		A/Mallard/Ohio/17OS1990/2017(Mixed)	MT566401	MT566409	MT566407	MT566404 MT566402	MT566410	MT566408 MT566403	MT566406	MT566405
		A/Mallard/Ohio/17OS3004/2017(H11N3)	MK237265	MK237951	MK237758	MK236933	MK237237	MK237729	MK237465	MK237655
		A/Mallard/Ohio/17OS3812/2017(H5N2)	MK237372	MK237814	MK237581	MK237194	MK237301	MK236857	MK237703	MK236776
		A/Mallard/Ohio/17OS5348/2017(H11N3)	MK237721	MK237718	MK237137	MK236760	MK236935	MK237859	MK237186	MK237120
		A/Mallard/Ohio/17OS5361/2017(H6N1)	MK237021	MK237666	MK236823	MK237854	MK237651	MK237646	MK236897	MK237945
		A/Mallard/Ohio/17OS5586/2017(H11N9)	MK237302	MK237934	MK236802	MK236927	MK236657	MK237657	MK237423	MK237670
		A/Mallard/Ohio/17OS5632/2017(H10N7)	MK237888	MK237383	MK236731	MK237431	MK237254	MK237754	MK237386	MK236978
		A/Mallard/Ohio/17OS5967/2017(H3N1)	MK237206	MK237327	MK237783	MK237585	MK236805	MK237601	MK236986	MK237439
		A/Mallard/Ohio/18OS0552/2018(H6N8)	MN431032	MN431029	MN431030	MN431031	MN431035	MN431028	MN431033	MN431034
		A/Mallard/Ohio/18OS1035/2018(H10N7)	MN431154	MN431153	MN431155	MN431151	MN431149	MN431152	MN431150	MN431148
		A/Mallard/Ohio/18OS1219/2018(H3N8)	MN431083	MN431082	MN431076	MN431078	MN431081	MN431080	MN431079	MN431077
		A/Mallard/Ohio/18OS1248/2018(H8N4)	MN431073	MN431071	MN431075	MN431074	MN431070	MN431068	MN431069	MN431072
		A/Mallard/Ohio/18OS1280/2018(H7N1)	MN431088	MN431085	MN431084	MN431086	MN431091	MN431089	MN431087	MN431090
		A/Mallard/Ohio/18OS1435/2018(H12N5)	MN431110	MN431112	MN431109	MN431108	MN431113	MN431114	MN431111	MN431115
		A/Mallard/Ohio/18OS1602/2018(H4N5)	MN431038	MN431042	MN431041	MN431039	MN431040	MN431043	MN431036	MN431037
		A/Mallard/Ohio/18OS1777/2018(H4N6)	MT565521	MT565525	MT565523	MT565526	MT565522	MT565519	MT565524	MT565520
		A/Mallard/Ohio/18OS1844/2018(H3N2)	MN430959	MN430960	MN430958	MN430961	MN430963	MN430962	MN430957	MN430956
		A/Mallard/Ohio/18OS1880/2018(H6N1)	MN430974	MN430978	MN430979	MN430973	MN430977	MN430972	MN430976	MN430975
		A/Mallard/Ohio/18OS1892/2018(H5N2)	MN431008	MN431004	MN431011	MN431009	MN431007	MN431010	MN431005	MN431006
		A/Mallard/Ohio/18OS1894/2018(Mixed)	MT565513	MT565516	MT565515	MT565514 MT566380	MT566379	MT565517 MT566381	MT565512	MT565511
		A/Mallard/Ohio/18OS1947/2018(Mixed)	MT565507	MT565506	MT565510	MT565508 MT566383	MT566382	MT565505	MT565509	MT565504
		A/Mallard/Ohio/18OS2014/2018(Mixed)	MT565532	MT565528	MT565529	MT565533	MT566322	MT565531 MT566323	MT565527	MT565530
		A/Mallard/Ohio/18OS2631/2018(H5N2)	MT566441	MT566440	MT566443	MT566447	MT566445	MT566442	MT566446	MT566444
		A/Mallard/Ohio/18OS2700/2018(H1N1)	MN430845	MN430849	MN430848	MN430851	MN430844	MN430850	MN430847	MN430846
		A/Mallard/Ohio/18OS2716/2018(H4N6)	MN430843	MN430836	MN430840	MN430842	MN430841	MN430839	MN430837	MN430838
		A/Mallard/Ohio/18OS2719/2018(H4N6)	MN430894	MN430898	MN430899	MN430897	MN430900	MN430895	MN430896	MN430893
		A/Mallard/Ohio/18OS2738/2018(H1N2)	MN795035	MN795037	MN795033	MN795032	MN795034	MN795031	MN795030	MN795036
		A/Mallard/Ohio/18OS2787/2018(H6N1)	MN795048	MN795047	MN795051	MN795049	MN795050	MN795046	MN795053	MN795052
		A/Mallard/Ohio/18OS4660/2018(H4N6)	MN431145	MN431141	MN431143	MN431146	MN431140	MN431147	MN431144	MN431142
		A/Mallard/Ohio/18OS4664/2018(H6N1)	MN431123	MN431117	MN431120	MN431116	MN431121	MN431118	MN431119	MN431122
		A/Mallard/Ohio/18OS4675/2018(H3N8)	MT566453	MT566450	MT566449	MT566451	MT566448	MT566454	MT566455	MT566452
		A/Mallard/Ohio/18OS4728/2018(H11N2)	MN431125	MN431128	MN431124	MN431126	MN431130	MN431131	MN431129	MN431127
		A/Mallard/Ohio/19OS0083/2019(H10N7)	MT197159	MT197164	MT197162	MT197160	MT197163	MT197161	MT197158	MT197165
		A/Mallard/Ohio/19OS0095/2019(H10N7)	MT197136	MT197141	MT197140	MT197137	MT197138	MT197135	MT197134	MT197139
		A/Mallard/Ohio/19OS0172/2019(H10N4)	MT197154	MT197156	MT197155	MT197152	MT197151	MT197150	MT197153	MT197157
		A/Mallard/Ohio/19OS0176/2019(H1N1)	MT197143	MT197144	MT197148	MT197142	MT197146	MT197145	MT197149	MT197147
		A/Mallard/Ohio/19OS0177/2019(H1N1)	MT197124	MT197118	MT197119	MT197120	MT197121	MT197122	MT197123	MT197125
		A/Mallard/Ohio/19OS0184/2019(H1N1)	MT197128	MT197127	MT197131	MT197126	MT197129	MT197130	MT197132	MT197133
